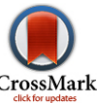

## Correction

# Correction: Full Genome Virus Detection in Fecal Samples Using Sensitive Nucleic Acid Preparation, Deep Sequencing, and a Novel Iterative Sequence Classification Algorithm

The *PLOS ONE* Staff

The second author's name is incorrect. The correct name is Bas B. Oude Munnink. The correct citation is: Cotten M, Oude Munnink BB, Canuti M, Deijs M, Watson SJ, et al. (2014) Full Genome Virus Detection in Fecal Samples Using Sensitive Nucleic Acid Preparation, Deep Sequencing, and a Novel Iterative Sequence Classification Algorithm. *PLoS ONE* 9(4): e93269. doi:10.1371/journal.pone.0093269

## Reference

1. Cotten M, Oude Munnink B, Canuti M, Deijs M, Watson SJ, et al. (2014) Full Genome Virus Detection in Fecal Samples Using Sensitive Nucleic Acid Preparation, Deep Sequencing, and a Novel Iterative Sequence Classification Algorithm. *PLoS ONE* 9(4): e93269. doi:10.1371/journal.pone.0093269.

**Citation:** The *PLOS ONE* Staff (2014) Correction: Full Genome Virus Detection in Fecal Samples Using Sensitive Nucleic Acid Preparation, Deep Sequencing, and a Novel Iterative Sequence Classification Algorithm. *PLoS ONE* 9(7): e101921. doi:10.1371/journal.pone.0101921

**Published:** July 1, 2014

**Copyright:** © 2014 The *PLOS ONE* Staff. This is an open-access article distributed under the terms of the Creative Commons Attribution License, which permits unrestricted use, distribution, and reproduction in any medium, provided the original author and source are credited.
